# Supplementary material for: A green and sustainable multi-enzyme cascade for the biosynthesis of 1,3-propanediamine from crude glycerol in vitro
Source: Royal Society of Chemistry journal article supplement (doi:10.1039/d4gc03777d), 2024-01-01
Supplement: d4gc03777d1.pdf [file d4gc03777d1.pdf]

## Supporting information

### **A green and sustainable multi-enzyme cascade for 1,3-diaminopropane biosynthesis from crude glycerol in vitro**

Daocheng Liao<sup>a</sup>, Shiming Tang<sup>a</sup>, Ying Lin<sup>a,\*</sup>, Suiping Zheng<sup>a,\*</sup>

[a]D. Liao, S. Tang, Y Lin, S. Zheng

Guangdong Key Laboratory of Fermentation and Enzyme Engineering, School of Biology and  
Biological Engineering

South China University of Technology

Guangzhou 510006, P. R. China

\*Corresponding Author

E-mail: [spzheng@scut.edu.cn](mailto:spzheng@scut.edu.cn) (S.Zheng).

E-mail: [feylin@scut.edu.cn](mailto:feylin@scut.edu.cn) (Ying Lin)

Table S1 The genes and plasmids used in this study

| Gene Name                 | Source                                        | Plasmid                        | Enzyme name             |
|---------------------------|-----------------------------------------------|--------------------------------|-------------------------|
| <i>ScALDO</i>             | <i>Streptomyces coelicolor A3</i>             | pET28a-ScALDO                  | alditol oxidase         |
| <i>PsoTA</i>              | <i>Pseudomonas sp. Strain AAC</i>             | pET28a-PsoTA                   | $\omega$ -Transaminase  |
| <i>AfAlaDH</i>            | <i>Archaeoglobus fulgidus VC-16 (DSM4304)</i> | pET28a-AfAlaDH                 | Alanine dehydrogenase   |
| <i>RsPTXD</i>             | <i>Ralstonia sp. strain 4506</i>              | pET28a-RsPTXD                  | Phosphite Dehydrogenase |
| <i>KpGDHT</i>             | <i>Klebsiella pneumoniae</i>                  | PACYCduet-1-KpGDHt             | Glycerol Dehydratase    |
| <i>KpGDHT/Q337A</i>       | <i>Klebsiella pneumoniae</i>                  | PACYCduet-1-KpGDHt/Q337A       | Glycerol Dehydratase    |
| <i>KpGDHT/Q337A/S302D</i> | <i>Klebsiella pneumoniae</i>                  | PACYCduet-1-KpGDHt/Q337A/S302D | Glycerol Dehydratase    |

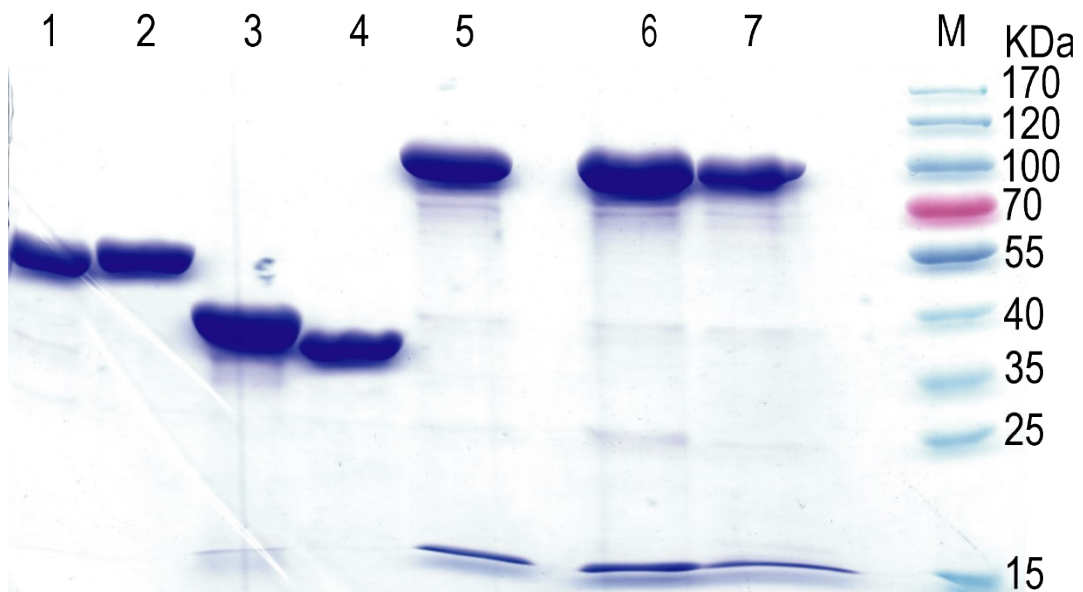

Fig S1 SDS-PAGE of purified enzymes. Lane 1: ScALDO, Lane 2: Ps $\omega$ TA, Lane 3: AfAlaDH, Lane 4: RsPTXD, Lane 5: KpGDHT, Lane 6: KpGDHT/Q337A, Lane 7: KpGDHT/Q337A/S302D, M: Marker.

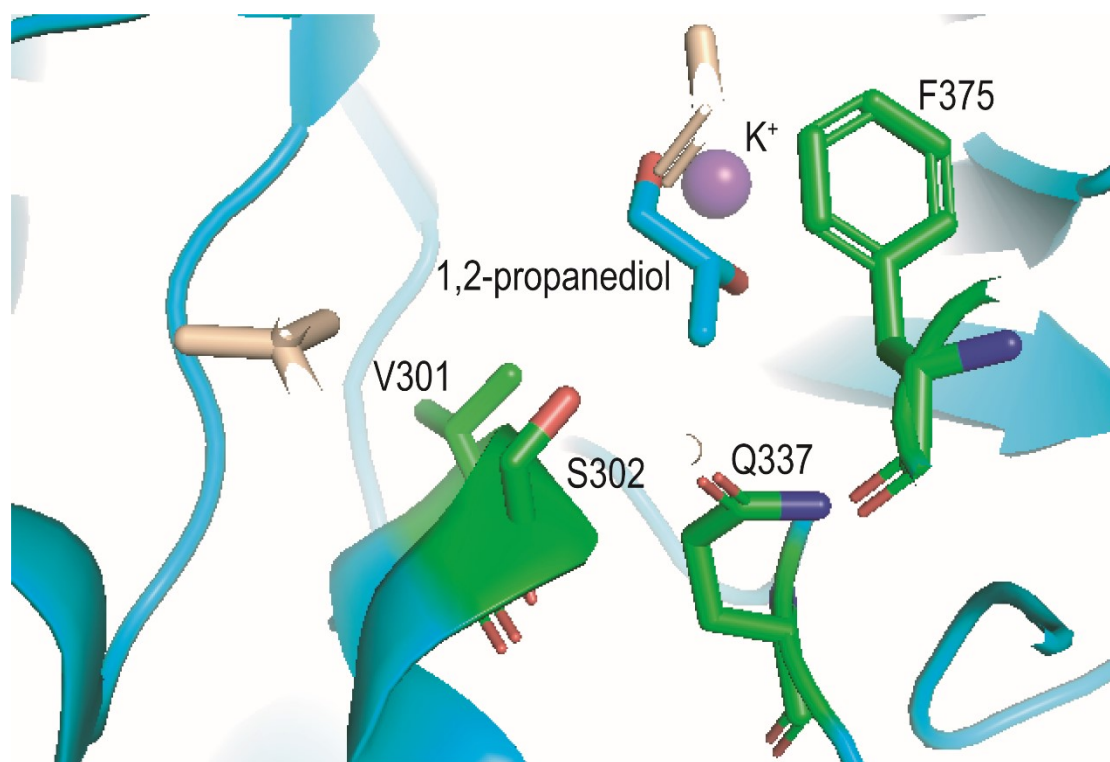

Fig S2 Selection of mutation residues for glycerol dehydratase.

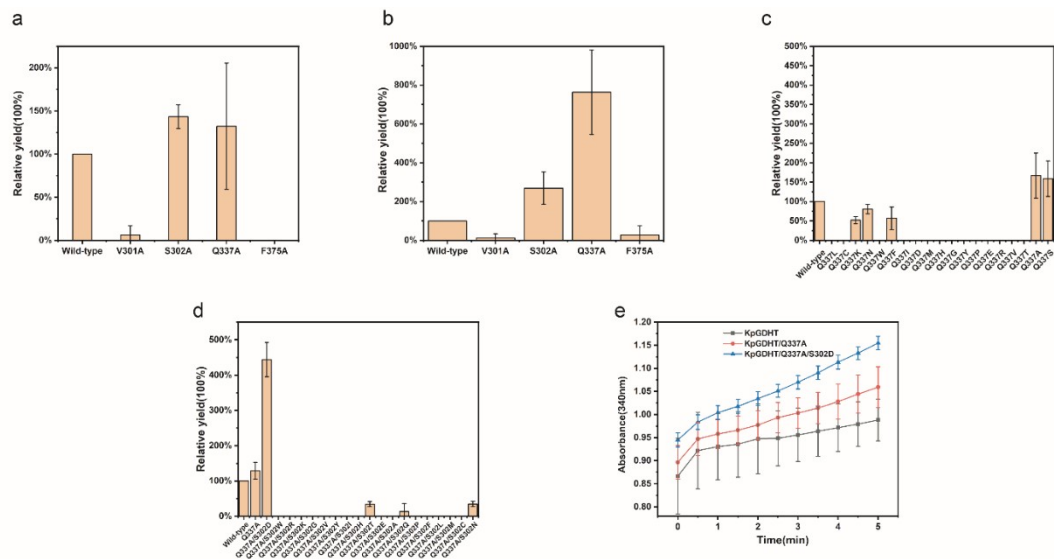

Fig S3 Enzyme modification. (a) Comparison of enzyme activity under 10mM 3-amino-1,2-propanediol for V301A, S302A, Q337A, F375A mutations. (b) Comparison of enzyme activity under 100mM 3-amino-1,2-propanediol for V301A, S302A, Q337A, F375A mutations. (c) Comparison of enzyme activity under conditions of 10mM 3-amino-1,2-propanediol for saturated mutants at KpGDHT's 337 residue. (d) Comparison of enzyme activity under conditions of 10mM 3-amino-1,2-propanediol for saturated mutants at KpGDHT/Q337A's 302 residue. (e) Comparison of enzyme activity for KpGDHT and mutants under conditions of 10mM 3-amino-1,2-propanediol.

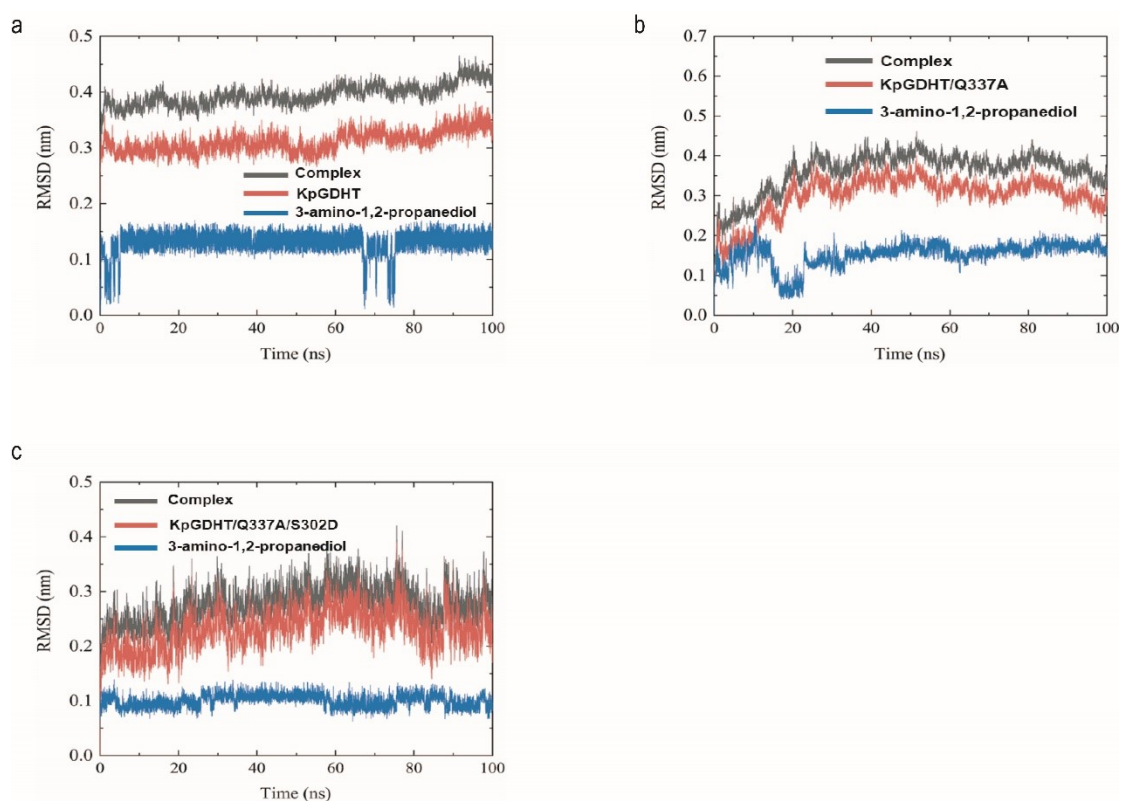

Fig S4 Result of molecular dynamics simulation (a) RMSD of the complex between 3-amino-1,2-propanediol and KpGDHT. (b) RMSD of the complex between 3-amino-1,2-propanediol and KpGDHT/Q337A. (c) RMSD of the complex between 3-amino-1,2-propanediol and KpGDHT/Q337A/S302D.

Table S2: Primers required for KpGDHT modification.

| Primer      | Primer sequence (5'to3')                                     |
|-------------|--------------------------------------------------------------|
| VAL301ALA-S | GGTGCGGGTGTTC AAGTTTGCAGAATGGTGCTGCGAGCTGCATAGGTATGACCGGTGC  |
| VAL301-A    | CAAACCTTGAACACCCGCACC                                        |
| PHE375ALA-A | TGTAGTCGTCGAAATCTTCAGCGTCGAAGTTTCGAGCCAGCCGCCATGTTATCATAATTC |
| PHE375-S    | CGACGCTGAAGATTTTCGACGACTACA                                  |
| SER302ALA-S | GGTGCGGGTGTTC AAGTTTGCAGAATGGTGCTGTGGCGTGCATAGGTATGACCGGTGC  |
| SER302ARG-S | GGTGCGGGTGTTC AAGTTTGCAGAATGGTGCTGTGCGTTGCATAGGTATGACCGGTGC  |
| SER302ASN-S | GGTGCGGGTGTTC AAGTTTGCAGAATGGTGCTGTGAACTGCATAGGTATGACCGGTGC  |
| SER302ASP-S | GGTGCGGGTGTTC AAGTTTGCAGAATGGTGCTGTGGACTGCATAGGTATGACCGGTGC  |
| SER302CYS-S | GGTGCGGGTGTTC AAGTTTGCAGAATGGTGCTGTGTGCTGCATAGGTATGACCGGTGC  |
| SER302GLN-S | GGTGCGGGTGTTC AAGTTTGCAGAATGGTGCTGTGCAATGCATAGGTATGACCGGTGC  |
| SER302GLU-S | GGTGCGGGTGTTC AAGTTTGCAGAATGGTGCTGTGGAGTGCATAGGTATGACCGGTGC  |
| SER302GLY-S | GGTGCGGGTGTTC AAGTTTGCAGAATGGTGCTGTGGGTTGCATAGGTATGACCGGTGC  |
| SER302HIS-S | GGTGCGGGTGTTC AAGTTTGCAGAATGGTGCTGTGCATTGCATAGGTATGACCGGTGC  |
| SER302ILE-S | GGTGCGGGTGTTC AAGTTTGCAGAATGGTGCTGTGATTTGCATAGGTATGACCGGTGC  |
| SER302LEU-S | GGTGCGGGTGTTC AAGTTTGCAGAATGGTGCTGTGTTGTGCATAGGTATGACCGGTGC  |
| SER302LYS-S | GGTGCGGGTGTTC AAGTTTGCAGAATGGTGCTGTGAAATGCATAGGTATGACCGGTGC  |

|             |                                                              |
|-------------|--------------------------------------------------------------|
| SER302MET-S | GGTGCGGGTGTTC AAGGTTTGCAGAATGGTGCTGTGATGTGCATAGGTATGACCGGTGC |
| SER302PHE-S | GGTGCGGGTGTTC AAGGTTTGCAGAATGGTGCTGTGTTCTGCATAGGTATGACCGGTGC |
| SER302PRO-S | GGTGCGGGTGTTC AAGGTTTGCAGAATGGTGCTGTGCCGTGCATAGGTATGACCGGTGC |
| SER302THR-S | GGTGCGGGTGTTC AAGGTTTGCAGAATGGTGCTGTGACCTGCATAGGTATGACCGGTGC |
| SER302TRP-S | GGTGCGGGTGTTC AAGGTTTGCAGAATGGTGCTGTGTGGTGCATAGGTATGACCGGTGC |
| SER302TYR-S | GGTGCGGGTGTTC AAGGTTTGCAGAATGGTGCTGTGATTGCATAGGTATGACCGGTGC  |
| SER302VAL-S | GGTGCGGGTGTTC AAGGTTTGCAGAATGGTGCTGTGGTGTGCATAGGTATGACCGGTGC |
| SER302-A    | CAAACCTGAACACCCGCACC                                         |
| GLN337ALA-A | GAGCGGTACGACGGATATCGCTATGGGAAAAGGTGCGATCGTTCGCTGAAGCCACCTC   |
| GLN337ARG-A | GAGCGGTACGACGGATATCGCTATGGGAAAAGGTGCGATCGTTCGCTGAAGCCACCTC   |
| GLN337ASN-A | GAGCGGTACGACGGATATCGCTATGGGAAAAGGTATTATCGTTCGCTGAAGCCACCTC   |
| GLN337ASP-A | GAGCGGTACGACGGATATCGCTATGGGAAAAGGTATCATCGTTCGCTGAAGCCACCTC   |
| GLN337CYS-A | GAGCGGTACGACGGATATCGCTATGGGAAAAGGTGCAATCGTTCGCTGAAGCCACCTC   |
| GLN337SER-A | GAGCGGTACGACGGATATCGCTATGGGAAAAGGTTGAATCGTTCGCTGAAGCCACCTC   |
| GLN337GLU-A | GAGCGGTACGACGGATATCGCTATGGGAAAAGGTCTCATCGTTCGCTGAAGCCACCTC   |
| GLN337GLY-A | GAGCGGTACGACGGATATCGCTATGGGAAAAGGTGCCATCGTTCGCTGAAGCCACCTC   |
| GLN337HIS-A | GAGCGGTACGACGGATATCGCTATGGGAAAAGGTATGATCGTTCGCTGAAGCCACCTC   |
| GLN337ILE-A | GAGCGGTACGACGGATATCGCTATGGGAAAAGGTGATATCGTTCGCTGAAGCCACCTC   |
| GLN337LEU-A | GAGCGGTACGACGGATATCGCTATGGGAAAAGGTCAGATCGTTCGCTGAAGCCACCTC   |
| GLN337LYS-A | GAGCGGTACGACGGATATCGCTATGGGAAAAGGTCTTATCGTTCGCTGAAGCCACCTC   |
| GLN337MET-A | GAGCGGTACGACGGATATCGCTATGGGAAAAGGTCATATCGTTCGCTGAAGCCACCTC   |
| GLN337PHE-A | GAGCGGTACGACGGATATCGCTATGGGAAAAGGTAAAATCGTTCGCTGAAGCCACCTC   |
| GLN337PRO-A | GAGCGGTACGACGGATATCGCTATGGGAAAAGGTGCGATCGTTCGCTGAAGCCACCTC   |
| GLN337THR-A | GAGCGGTACGACGGATATCGCTATGGGAAAAGGTGGTATCGTTCGCTGAAGCCACCTC   |
| GLN337TRP-A | GAGCGGTACGACGGATATCGCTATGGGAAAAGGTCCAATCGTTCGCTGAAGCCACCTC   |
| GLN337TYR-A | GAGCGGTACGACGGATATCGCTATGGGAAAAGGTATAATCGTTCGCTGAAGCCACCTC   |
| GLN337VAL-A | GAGCGGTACGACGGATATCGCTATGGGAAAAGGTGACATCGTTCGCTGAAGCCACCTC   |
| GLN337-S    | AGCGATATCCGTCGTACCGCTC                                       |

---

Table S3. Amino acid sequences of enzymes

| Gene Name      | Source                                                  | Amino Acids Sequence                                                                                                                                                                                                                                                                                                                                                                                                                                                                                                             |
|----------------|---------------------------------------------------------|----------------------------------------------------------------------------------------------------------------------------------------------------------------------------------------------------------------------------------------------------------------------------------------------------------------------------------------------------------------------------------------------------------------------------------------------------------------------------------------------------------------------------------|
| <i>ScALDO</i>  | <i>Streptomyces coelicolor A3</i>                       | MSDITVTNWAGNITYTAKELLRPHSLD<br>ALRALVADSARVRVLGSGHSFNEIAEPG<br>DGGVLLSLAGLPSVVDVDTAARTVRVG<br>GGVRYAELARVVHARGLALPNMASLP<br>HISVAGSVATGTHGSGMGNGSLASMVR<br>EVELVTADGSTVVIARGDERFGGAVTS<br>LGALGVVTSLTLDLEPAYEMEQHVFT<br>LPLAGLDPATFETVMAAAYSVSLFTDW<br>RAPGFRQVWLKRRRTDRPLDGFYAAPA<br>TEKMHPVPGMPAVNCTEQFGVPGPWH<br>ERLPHFRAEFTPSSGAELQSEYLMPREH<br>ALAALHAMDAIRETLAPVLQTCEIRTV<br>ADAQWLSPAYGRDTVAAHFTWVEDTA<br>AVLPVRRLEEALVPFAARPHWGKVFT<br>VPAGELRALYPRLADFGALARALDPAG<br>KFTNAFVRGVLG                                       |
| <i>PsoTA</i>   | <i>Pseudomonas sp. Strain AAC</i>                       | MNQQVNVAPSAAADLNLKAHWMPFSA<br>NRNFHKDPRIIVAAEGSWLVDDKGRRI<br>YDSLGLWTCGAGHSRKEIADAVAKQI<br>GTLDYSPGFQYGHPLSFQLAEKIAQMTP<br>GTLDHVFFTGSGSECADTSIKMARAYW<br>RIKGQAQKTKLIGRARGYHGVNVAGTS<br>LGGIGGNRKMFGPLMDVDHLPHTLQPG<br>MAFTKGA AETGGVELANELLKLIELHD<br>ASNIAAVIVEPMSGSAGVIVPPKGYLQR<br>LREICDANDILLIFDEVITAFGRMGKATG<br>AEYFGVTPDIMNVAKQVTNGAVPMGA<br>VIASSEIYDTFMNQNLPEYAVEFGHGYT<br>YSAHPVACAAGIAALDLLQKENLIQQS<br>AELAPHFEKALHGLKGTKNVIDIRNCGL<br>AGAIQIAARDGDAIVRPFEASMKLWKE<br>GFYVRFGGDTLQFGPTFNAKPEDLDRLF<br>DAVGEALNGVA |
| <i>AfAlaDH</i> | <i>Archaeoglobus fulgidus</i><br><i>VC-16 (DSM4304)</i> | METLILTQEEVESLISMDEAMNAVEEAF<br>RLYALGKAQMPPKVYLEFEKGD LRAM<br>PAHLMGYAGLKWVNSHPGNPDKGLPT<br>VMALMILNSPETGFPLAVMDATYTTSL<br>RTGAAGGIAAKYLARKNSSVFGFIGCGT<br>QAYFQLEALRRVFDIGEVKAYDVREKA<br>AKKFVSYCEDRGISASVQPAEEASRCDV<br>LVTTTTPSRKPVVKA EWVEEGTHINAIGA                                                                                                                                                                                                                                                                        |



|                                                |                                                                                                                                                                                                                                                                                                                                                                                                                                                                                                                                                                                                                                                                                                                                                                                                                                                                               |
|------------------------------------------------|-------------------------------------------------------------------------------------------------------------------------------------------------------------------------------------------------------------------------------------------------------------------------------------------------------------------------------------------------------------------------------------------------------------------------------------------------------------------------------------------------------------------------------------------------------------------------------------------------------------------------------------------------------------------------------------------------------------------------------------------------------------------------------------------------------------------------------------------------------------------------------|
|                                                | DGPGKQELDVEILKKAKIVVDDLEQAK<br>HGGEINVAVSKGVIGVEDVHATIGEVIA<br>GLKDGRESDEEITIFDSTGLAIQDVAVA<br>KVVYENALSKNVGSKIKFFRI                                                                                                                                                                                                                                                                                                                                                                                                                                                                                                                                                                                                                                                                                                                                                          |
| <i>RsPTXD</i> <i>Ralstonia sp. strain 4506</i> | MKPKVVLTHWVHPEIIELLSASADVIPN<br>TTRETLRSEVIARAKDADALMAFMPD<br>SIDSAFLEECPLRVIGAALKGYDNFDV<br>NACTRHGVWLTIVPDLLTIPTAELTIGLL<br>LGLTRHMLEGDRQIRSGHFQGWRTLY<br>GSGLTGKTLGIIGMGAVGRAIAQRLAGF<br>EMNLLYCDPIPLNAEQEKAWHVQRVTL<br>DELLEKCDYVVPMPMAAETLHLIDAT<br>ALAKMKTGSYLINACRGSVVDENAVIA<br>ALASGKLAGYAADVFEEMEEWIRADRP<br>QAIPKALLDNTAQTFFTPPLGSAVKEVR<br>LEIERQAAMNIIQALAGEKPMGAINQPY<br>PGVCAA                                                                                                                                                                                                                                                                                                                                                                                                                                                                                 |
| <i>KpGDHT</i> <i>Klebsiella pneumoniae</i>     | MKRSKRFAVLAQRPVNQDGLIGEWPEE<br>GLIAMDSPFDPVSSVKVDNGLIVELDGK<br>RRDQFDMIDRFIADYAINVERTEQAMR<br>LEAVEIARMLVDIHVSREEIIAITTAITPA<br>KAVEVMAQMNVVEMMMALQKMRAR<br>RTPSNQCHVTNLKDNPVQIAADAAEAG<br>IRGFSEQETTVGIARYAPFNALALLVGS<br>QCGRPGVLTQCSVEEATELELGMRGLT<br>SYAETVSVYGTEAVFTDGDTPWSKAF<br>LASAYASRGLKMRYTSGTGSEALMGYS<br>ESKSMLEYESRCIFITKGAGVQGLQNGA<br>VSCIGMTGAVPSGIRAVLAENLIASMLD<br>LEVASANDQTFSHSDIRRTARTLMQML<br>PGTDFIFSGYSAVPNYDNMFAGSNFDAE<br>DFDDYNILQRDLMVDGGLRPVTEAETI<br>AIRQKAARAIQAVFRELGLPPIADEEVE<br>AATYAHGSNEMPPRNVEDLSAVEEM<br>MKRNITGLDIVGALSRSFGEDIASNILN<br>MLRQRVTGDYDYLQTSAILDRQFEVVSVA<br>NDINDYQGPVTGYRISAERWAEIKNIPG<br>VVQPDITIEGPTPTPTPTPTPTPTPTPTPT<br>PTGMQQTQIQPSFTLKTREGGVASADE<br>RADEVVIGVGPFDKHQHHTLIDMPHG<br>AILKELIAGVEEEGLHARVVRILRTSDVS<br>FMAWDAANLSGSGIGIGIQSKGTTVIHQ<br>RDLLPLSNLELFSQAPLLTLETYRQIGKN<br>AARYARKESPSPVPVNDQMVRPKFM |

---

AKAALFHKETKHVVQDAEPVTLHIDL  
VRE  
MSEKTMRVQDYPLATRCPEHILTPTGKP  
LTDITLEKVLSGEVGPQDVRISRQTLEY  
QAQIAEQMQRHAVARNFRAAELIAP  
DERILAIYNALRPFRSSQAELLIADELE  
HTWHATVNAAFVRESAEVYQQRHKLK  
KGS

---

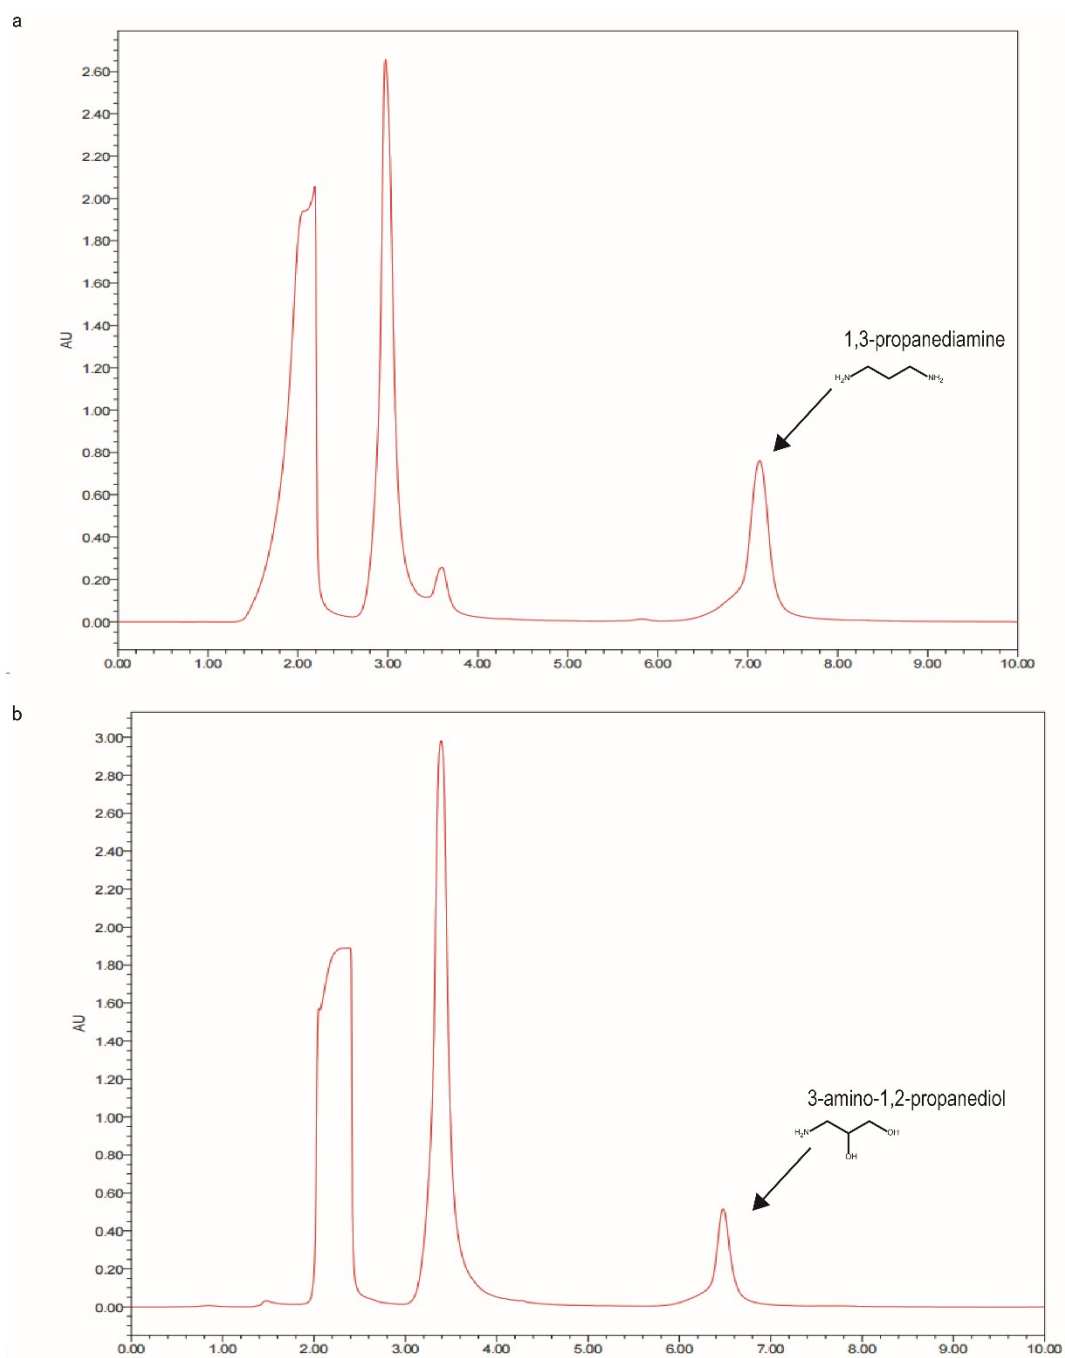

Fig. S4 HPLC analysis of the products. (a) 1,3-propanediamine. (b) 3-amino-1,2-propanediol.
